# Supplementary material
Source: PubMed Central journal article supplement (PMC5733576)
Supplement: supp_AC117.000548_133322_1_supp_19980_gyxs34.pdf [file supp_AC117.000548_133322_1_supp_19980_gyxs34.pdf]

## Supplemental Information

**Table S1. Strains used in this study.**

| Strain Name | Description                                                                                                                                                          |
|-------------|----------------------------------------------------------------------------------------------------------------------------------------------------------------------|
| NH0132      | <i>W303 MAT a leu2-3,112 trp1-1 can1-100 ura3-1 ADE2+ his3-11,15, bar1Δ, NHP6a-iRFP-kanMX</i>                                                                        |
| NH0615      | <i>W303 MAT a trp1-1 can1-100 ura3-1 ADE2+ his3-11,15, bar1Δ, NHP6a-iRFP-kanMX, leu2-3,112::LEU2-P<sub>ADHI</sub>-FUS2(54-99)S67A-mCherry</i>                        |
| NH0610      | <i>W303 MAT a trp1-1 can1-100 ura3-1 ADE2+ his3-11,15, bar1Δ, NHP6a-iRFP-kanMX, leu2-3,112::LEU2-P<sub>ADHI</sub>-KTR-mCherry (reporter variant 1)</i>               |
| NH0618      | <i>W303 MAT a trp1-1 can1-100 ura3-1 ADE2+ his3-11,15, bar1Δ, NHP6a-iRFP-kanMX, leu2-3,112::LEU2-P<sub>ADHI</sub>-reporter variant 2-mCherry</i>                     |
| NH0620      | <i>W303 MAT a trp1-1 can1-100 ura3-1 ADE2+ his3-11,15, bar1Δ, NHP6a-iRFP-kanMX, leu2-3,112::LEU2-P<sub>ADHI</sub>-reporter variant 3-mCherry</i>                     |
| NH0621      | <i>W303 MAT a trp1-1 can1-100 ura3-1 ADE2+ his3-11,15, bar1Δ, NHP6a-iRFP-kanMX, leu2-3,112::LEU2-P<sub>ADHI</sub>-reporter variant 4-mCherry</i>                     |
| NH0617      | <i>W303 MAT a trp1-1 can1-100 ura3-1 ADE2+ his3-11,15, bar1Δ, NHP6a-iRFP-kanMX, leu2-3,112::LEU2-P<sub>ADHI</sub>-reporter variant 5-mCherry</i>                     |
| NH0619      | <i>W303 MAT a trp1-1 can1-100 ura3-1 ADE2+ his3-11,15, bar1Δ, NHP6a-iRFP-kanMX, leu2-3,112::LEU2-P<sub>ADHI</sub>-reporter variant 6-mCherry</i>                     |
| NH0639      | <i>W303 MAT a trp1-1 can1-100 ura3-1 ADE2+ his3-11,15, bar1Δ, NHP6a-iRFP-kanMX, leu2-3,112::LEU2-P<sub>ADHI</sub>-KTR-mCherry, kss1::URA3</i>                        |
| NH0611      | <i>W303 MAT a trp1-1 can1-100 ura3-1 ADE2+ his3-11,15, bar1Δ, NHP6a-iRFP-kanMX, leu2-3,112::LEU2-P<sub>ADHI</sub>-KTR-mCherry, fus3::URA3</i>                        |
| NH0613      | <i>W303 MAT a trp1-1 can1-100 ura3-1 ADE2+ his3-11,15, bar1Δ, NHP6a-iRFP-kanMX, leu2-3,112::LEU2-P<sub>ADHI</sub>-KTR-mCherry, FUS3Q93G</i>                          |
| NH0625      | <i>W303 MAT a trp1-1 can1-100 ura3-1 ADE2+ his3-11,15, bar1Δ, NHP6a-iRFP-kanMX, leu2-3,112::LEU2-P<sub>ADHI</sub>-KTR-mCherry, P<sub>FUS1</sub>-UBI-YΔkGFP -HIS3</i> |
| NH0626      | <i>W303 MAT a trp1-1 can1-100 ura3-1 ADE2+ his3-11,15, bar1Δ, NHP6a-iRFP-kanMX, leu2-3,112::LEU2-P<sub>ADHI</sub>-KTR-mCherry, FUS3Q93G, kss1::URA3</i>              |

**A**

54 KLNDKKFTN<sup>67</sup>KRPAALDLHSIVESLSN<sup>84</sup>KKIYSPINTEIFQN<sup>99</sup>VVRLNL 99

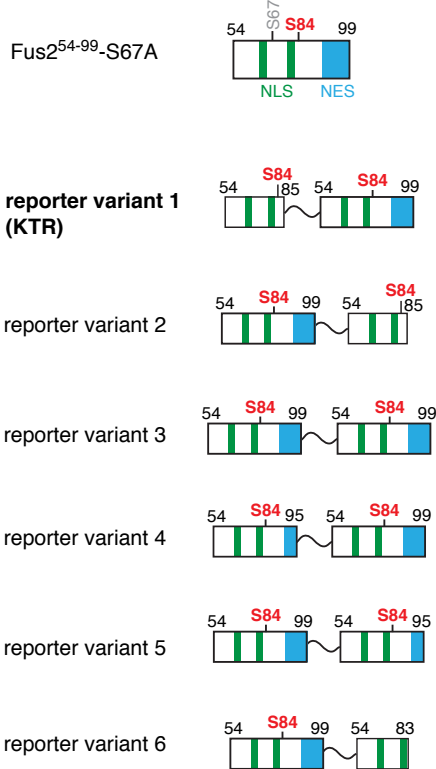**B**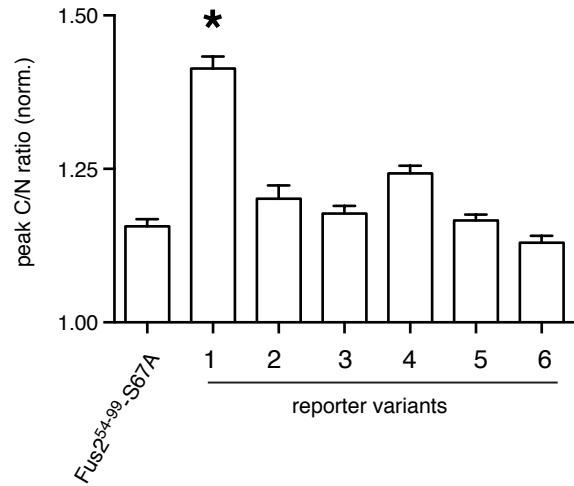

**Fig. S1. Examination of reporter variants.** (A) Schematics of reporter variants. Top panel: the amino acid sequence of Fus2<sup>54-99</sup>-S67A. Green regions: NLS; blue regions: NES. A series of reporter variants were constructed by assembling different truncated forms of Fus2<sup>54-99</sup>-S67A to the N or C terminus of the original fragment with a flexible linker (Gly-Gly-Ser-Gly-Gly) in between. (B) Bar graphs comparing the dynamic ranges of reporter variants. The translocation responses of different reporter variants were measured in response to a 30-minute pulse of 1  $\mu$ M pheromone treatment and quantified as the cytoplasmic over nuclear fluorescence intensities (C/N ratio) normalized by the basal level. The peak values were plotted for Fus2<sup>54-99</sup>-S67A and each variant. Reporter variant 1 showed the highest peak response and was chosen as the kinase translocation reporter (KTR) for Fus3 activity.

**round shaped/vegetative growth**

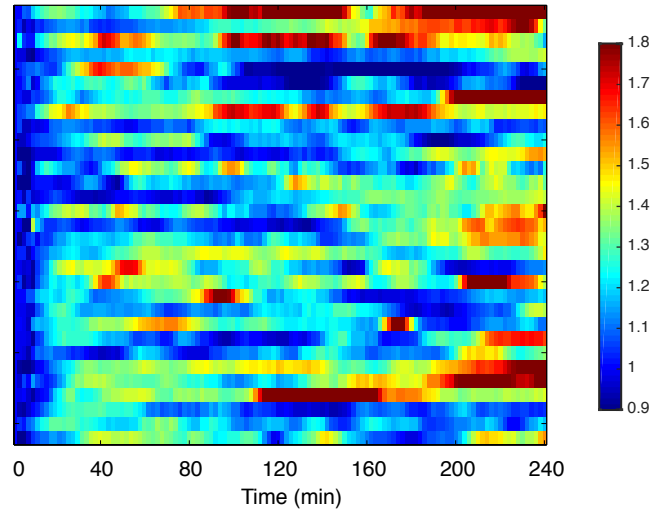

**Fig. S2. Fus3 dynamics in cells remaining round shaped or vegetative growth.** Single-cell color map trajectories of Fus3 activation for cells that remained round shaped or vegetative growth in response to 0.25  $\mu\text{M}$  pheromone treatment. Each row represents the time trace of a single cell. Color represents the normalized C/N ratio, as indicated in the color bar (identical to that used in Fig. 2).
